# Supplementary material for: Is Azvudine Comparable to Nirmatrelvir-Ritonavir in Real-World Efficacy and Safety for Hospitalized Patients with COVID-19? A Retrospective Cohort Study
Source: PubMed Central journal article supplement — Infect Dis Ther. 2023 Jul 24;12(8):2087–102. doi: 10.1007/s40121-023-00845-7 (PMC10505125; doi:10.1007/s40121-023-00845-7), 2023-07-24
Supplement: 40121_2023_845_MOESM1_ESM.pdf [file 40121_2023_845_MOESM1_ESM.pdf]

## **Is Azvudine Comparable to Nirmatrelvir-Ritonavir in Real-World Efficacy and Safety for Hospitalized COVID-19 Patients? A Retrospective Cohort Study**

Qinqin Zhao<sup>1#</sup>· Bei Zheng<sup>1#</sup>· Bing Han<sup>1</sup>· Pinpin Feng<sup>1</sup>· Zhongni Xia<sup>1</sup>· Hong Jiang<sup>1</sup>· Yin Ying<sup>1</sup>· Jun Zhu<sup>1</sup>· Cheng Fei<sup>2</sup>· Junlei Xiang<sup>3</sup>· Lingli Shen<sup>4</sup>· Qiliang Luo<sup>5</sup>· Yinhan Wu<sup>6</sup>· Ayiguzhali Wusiman<sup>7</sup>· Chuanwei Xin<sup>1\*</sup>· Meiling Zhang<sup>1\*</sup>· Gonghua Li<sup>1\*</sup>· Xiang Li<sup>8\*</sup>

<sup>1</sup>Department of Pharmacy, Tongde Hospital of Zhejiang Province, Hangzhou, 310012, China.

<sup>2</sup>Department of Pharmacy, The 72nd Group Army Hospital of PLA, Huzhou, 313000, China.

<sup>3</sup>Department of Pharmacy, Longquan People's Hospital, Longquan, 323700, China.

<sup>4</sup>Department of Pharmacy, Linping Hospital of Integrated Traditional Chinese and Western Medicine, Hangzhou, 311100, China.

<sup>5</sup>Department of Pharmacy, Zhaotong Mental Health Center, Zhaotong, 657000, China.

<sup>6</sup>Department of Pharmacy, Ruian Fifth People's Hospital, Ruian, 325200, China.

<sup>7</sup>Department of Pharmacy, Fourth People's Hospital of Aksu Region, Aksu, 843000, China.

<sup>8</sup>School of Basic Medical Sciences & Forensic Medicine, Hangzhou Medical College, Hangzhou, 311399, China.

#Equal contribution.

\*Corresponding Author:

Chuanwei Xin, xcw373@163.com; Meiling Zhang, zml9998@163.com; Gonghua Li, ligonghua88@163.com. Department of Pharmacy, Tongde Hospital of Zhejiang Province, No. 234 Gucui Road, Xihu District, Hangzhou City, Zhejiang Province, 310012, China;

Xiang Li, leexiang@zju.edu.cn. School of Basic Medical Sciences and Forensic Medicine, Hangzhou Medical College, No. 8 Yikang Street, Lin'an District, Hangzhou City, Zhejiang Province, 311399, China.

## Supplementary information

### Table of Contents

|                                                                                                                                                                                                                           |    |
|---------------------------------------------------------------------------------------------------------------------------------------------------------------------------------------------------------------------------|----|
| Table S1 Severity of COVID-19 disease in accordance with the Chinese diagnosis and treatment protocol for COVID-19 infection (Version 10) .....                                                                           | 3  |
| Table S2 Univariate and multivariate Cox regression analyses of all-cause 28-day mortality for the main cohort.....                                                                                                       | 4  |
| Table S3 Univariate and multivariate Cox regression analyses of risk of 28-day progressing to critical condition for the main cohort .....                                                                                | 5  |
| Table S4 Univariate and multivariate Cox regression analyses of proportion of 28-day nucleic acid negative conversion for main cohort .....                                                                               | 6  |
| Table S5 Univariate and multivariate linear regression analyses of the first nucleic acid negative conversion time for the main cohort.....                                                                               | 7  |
| Table S6 Univariate and multivariate linear regression analyses of the hospital length of stay for the main cohort study.....                                                                                             | 8  |
| Table S7 Baseline characteristics of study participants of the complete dataset with missing values removing according to oral antivirals (n=387) .....                                                                   | 9  |
| Table S8 Associations between antivirals use and the efficacy outcomes in regression analysis for complete cohort (n=387) .....                                                                                           | 10 |
| Fig. S1 Forest plot for subgroup analyses of the efficacy of azvudine versus nirmatrelvir-ritonavir on all-cause 28-day mortality in patients with COVID-19 for main cohort .....                                         | 11 |
| Fig. S2 Forest plot for subgroup analyses of the efficacy of azvudine versus nirmatrelvir-ritonavir on risk of progressing to critical condition within 28 days in patients with COVID-19 for main cohort.....            | 12 |
| Fig. S3 Forest plot for subgroup analyses of the efficacy of azvudine versus nirmatrelvir-ritonavir on proportion of 28-day negative conversion of nucleic acid in patients with COVID-19 infection for main cohort ..... | 13 |
| Fig. S4 Forest plot for subgroup analyses of the efficacy of azvudine versus nirmatrelvir-ritonavir on the first nucleic acid negative conversion time in patients with COVID-19 infection for main cohort .....          | 14 |
| Fig. S5 Forest plot for subgroup analyses of the efficacy of azvudine versus nirmatrelvir-ritonavir on the hospital length of stay in patients with COVID-19 for main cohort.....                                         | 15 |

**Table S1** Severity of COVID-19 disease in accordance with the Chinese diagnosis and treatment protocol for COVID-19 infection (Version 10)

| Severity of COVID-19 | Characteristics                                                                                                                                                                                                                                                                                                                             |
|----------------------|---------------------------------------------------------------------------------------------------------------------------------------------------------------------------------------------------------------------------------------------------------------------------------------------------------------------------------------------|
| Mild type            | individuals who exhibit various symptoms of the disease, but do not experience shortness of breath, dyspnea or abnormal chest imaging                                                                                                                                                                                                       |
| Moderate type        | individuals exhibiting persistent high fever lasting more than three days, shortness of breath accompanied by a respiratory rate below 30 breaths/min, resting oxygen saturation levels measured by pulse oximetry above 93%, or chest imaging revealing the characteristic manifestations of COVID-19 pneumonia                            |
| Severe type          | individuals exhibiting respiratory distress, with a respiratory rate of $\geq 30$ breaths/min, resting finger oxygen saturation $\leq 93\%$ , arterial partial pressure of oxygen (PaO <sub>2</sub> )/fraction of inspired oxygen (FiO <sub>2</sub> ) $\leq 300$ mm Hg, or imaging indicating lesion progression $>50\%$ within 24-48 hours |
| Critical type        | individuals who experience respiratory failure requiring mechanical ventilation, develop shock, or suffer from multiple organ failures necessitating treatment in the intensive care unit (ICU)                                                                                                                                             |

**Table S2** Univariate and multivariate Cox regression analyses of all-cause 28-day mortality for the main cohort

| Factor                                 | Crude             |         | Model 1 <sup>a</sup> |         | Model 2 <sup>b</sup> |         | Model 3 <sup>c</sup> |         |
|----------------------------------------|-------------------|---------|----------------------|---------|----------------------|---------|----------------------|---------|
|                                        | HR 95%CI          | P value | HR 95%CI             | P value | HR 95%CI             | P value | HR 95%CI             | P value |
| Antiviral                              |                   |         |                      |         |                      |         |                      |         |
| Nirmatrelvir-ritonavir                 | 1 (ref)           |         | 1 (ref)              |         | 1 (ref)              |         | 1 (ref)              |         |
| Azvudine                               | 1.03 (0.45~2.35)  | 0.943   | 1.26 (0.54~2.96)     | 0.590   | 1.21 (0.51~2.87)     | 0.659   | 1.41 (0.56~3.56)     | 0.471   |
| Age, Mean ± SD, yr                     | 1.04 (1.00~1.09)  | 0.038   | 1.05 (1.00~1.09)     | 0.030   | 1.05 (1.01~1.09)     | 0.023   | 1.06 (1.01~1.11)     | 0.013   |
| Sex, n (%)                             |                   |         |                      |         |                      |         |                      |         |
| Male                                   | 1 (ref)           |         | 1 (ref)              |         | 1 (ref)              |         | 1 (ref)              |         |
| Female                                 | 0.53 (0.21~1.34)  | 0.180   | 0.91 (0.34~2.42)     | 0.853   | 0.84 (0.32~2.20)     | 0.717   | 0.80 (0.29~2.21)     | 0.673   |
| BMI, Mean ± SD                         | 1.30(1.18~1.43)   | <0.001  | 1.26 (1.13~1.41)     | <0.001  | 1.28 (1.14~1.43)     | <0.001  | 1.31 (1.16~1.47)     | <0.001  |
| Severity of COVID-19, n (%)            |                   |         |                      |         |                      |         |                      |         |
| Mild-to-moderate                       | 1 (ref)           |         | 1 (ref)              |         | 1 (ref)              |         | 1 (ref)              |         |
| Severe                                 | 8.82 (3.91~19.87) | <0.001  | 5.16 (2.12~12.53)    | <0.001  | 4.84 (2.00~11.76)    | <0.001  | 3.63 (1.42~9.3)      | 0.007   |
| Smoking, n (%)                         | 1.84 (0.55~6.18)  | 0.358   |                      |         |                      |         |                      |         |
| Drinking, n (%)                        | 0.76 (0.10~5.60)  | 0.775   |                      |         |                      |         |                      |         |
| Diabetes, n (%)                        | 1.81 (0.79~4.15)  | 0.158   |                      |         | 1.88 (0.78~4.54)     | 0.16    | 1.71 (0.69~4.25)     | 0.247   |
| Cardiovascular diseases, n (%)         | 1.16 (0.51~2.65)  | 0.726   |                      |         | 0.80(0.33~1.90)      | 0.611   | 0.68 (0.27~1.71)     | 0.417   |
| Chronic lung disease, n (%)            | 0.99 (0.34~2.91)  | 0.990   |                      |         | 1.08 (0.34~3.39)     | 0.894   | 1.16 (0.37~3.63)     | 0.801   |
| Tumor and immunosuppression, n (%)     | 1.48 (0.63~3.46)  | 0.366   |                      |         | 2.03 (0.82~5.06)     | 0.128   | 2.20 (0.88~5.51)     | 0.093   |
| LTM, Median (IQR), ×10 <sup>9</sup> /L | 0.69 (0.30~1.58)  | 0.377   |                      |         |                      |         | 0.70 (0.31~1.60)     | 0.400   |
| D-dimer, Median (IQR), mg/L            | 1.08 (1.04~1.13)  | <0.001  |                      |         |                      |         | 1.04 (0.99~1.10)     | 0.106   |
| CRP, Median (IQR), mg/L                | 1.01 (1.00~1.01)  | 0.008   |                      |         |                      |         | 1.00 (1.00~1.01)     | 0.277   |

Abbreviation: HR, hazard ratio; IQR, interquartile range; LTM, lymphocyte count; CRP, C-reactive protein; BMI, body mass index

<sup>a</sup> Model 1 was adjusted for age, sex, BMI, and severity of COVID-19; <sup>b</sup> Model 2 was adjusted as model 1 plus diabetes, cardiovascular diseases, chronic lung disease, and tumor and immunosuppression; <sup>c</sup> Model 3 was adjusted as model 2 plus LTM, D-dimer, and CRP.

**Table S3** Univariate and multivariate Cox regression analyses of risk of 28-day progressing to critical condition for the main cohort

| Factor                                 | Crude             |         | Model 1 <sup>a</sup> |         | Model 2 <sup>b</sup> |         | Model 3 <sup>c</sup> |         |
|----------------------------------------|-------------------|---------|----------------------|---------|----------------------|---------|----------------------|---------|
|                                        | HR 95%CI          | P value | HR 95%CI             | P value | HR 95%CI             | P value | HR 95%CI             | P value |
| Antiviral                              |                   |         |                      |         |                      |         |                      |         |
| Nirmatrelvir-ritonavir                 | 1 (ref)           |         | 1 (ref)              |         | 1 (ref)              |         | 1 (ref)              |         |
| Azvudine                               | 1.19 (0.59~2.42)  | 0.624   | 1.42 (0.69~2.92)     | 0.337   | 1.42 (0.69~2.94)     | 0.341   | 1.67 (0.78~3.60)     | 0.189   |
| Age, Mean ± SD, yr                     | 1.05 (1.01~1.08)  | 0.011   | 1.05 (1.01~1.09)     | 0.010   | 1.05 (1.01~1.09)     | 0.009   | 1.06 (1.02~1.11)     | 0.003   |
| Sex, n (%)                             |                   |         |                      |         |                      |         |                      |         |
| Male                                   | 1 (ref)           |         | 1 (ref)              |         | 1 (ref)              |         | 1 (ref)              |         |
| Female                                 | 0.53 (0.24~1.17)  | 0.117   | 0.83 (0.36~1.90)     | 0.654   | 0.78 (0.34~1.78)     | 0.548   | 0.73 (0.31~1.74)     | 0.480   |
| BMI, Mean ± SD                         | 1.20 (1.10~1.32)  | <0.001  | 1.15 (1.04~1.28)     | 0.007   | 1.16 (1.04~1.29)     | 0.006   | 1.18 (1.06~1.31)     | 0.002   |
| Severity of COVID-19, n (%)            |                   |         |                      |         |                      |         |                      |         |
| Mild-to-moderate                       | 1 (ref)           |         | 1 (ref)              |         | 1 (ref)              |         | 1 (ref)              |         |
| Severe                                 | 8.44 (4.19~16.99) | <0.001  | 5.72<br>(2.67~12.28) | <0.001  | 5.41<br>(2.51~11.67) | <0.001  | 4.58 (2.05~10.24)    | <0.001  |
| Smoking, n (%)                         | 1.36 (0.41~4.46)  | 0.627   |                      |         |                      |         |                      |         |
| Drinking, n (%)                        | 0.56 (0.08~4.07)  | 0.525   |                      |         |                      |         |                      |         |
| Diabetes, n (%)                        | 1.61 (0.77~3.33)  | 0.202   |                      |         | 1.56 (0.72~3.36)     | 0.261   | 1.64 (0.75~3.62)     | 0.219   |
| Cardiovascular diseases, n (%)         | 1.34 (0.66~2.72)  | 0.411   |                      |         | 0.99 (0.47~2.11)     | 0.984   | 0.88 (0.40~1.93)     | 0.753   |
| Chronic lung disease, n (%)            | 1.15 (0.48~2.80)  | 0.751   |                      |         | 1.11 (0.43~2.84)     | 0.830   | 1.14 (0.45~2.90)     | 0.782   |
| Tumor and immunosuppression, n (%)     | 1.57 (0.76~3.26)  | 0.226   |                      |         | 2.11 (0.96~4.62)     | 0.062   | 2.21 (1.00~4.88)     | 0.050   |
| LTM, Median (IQR), ×10 <sup>9</sup> /L | 0.54 (0.25~1.18)  | 0.122   |                      |         |                      |         | 0.51 (0.23~1.16)     | 0.110   |
| D-dimer, Median (IQR), mg/L            | 1.07 (1.02~1.12)  | 0.002   |                      |         |                      |         | 1.03 (0.98~1.08)     | 0.292   |
| CRP, Median (IQR), mg/L                | 1.01 (1.00~1.01)  | 0.017   |                      |         |                      |         | 1.01 (1.00~1.01)     | 0.591   |

Abbreviation: HR, hazard ratio; IQR, interquartile range; LTM, lymphocyte count; CRP, C-reactive protein; BMI, body mass index

<sup>a</sup> Model 1 was adjusted for age, sex, BMI, and severity of COVID-19; <sup>b</sup> Model 2 was adjusted as model 1 plus diabetes, cardiovascular diseases, chronic lung disease, and tumor and immunosuppression; <sup>c</sup> Model 3 was adjusted as model 2 plus LTM, D-dimer, and CRP.

**Table S4** Univariate and multivariate Cox regression analyses of proportion of 28-day nucleic acid negative conversion for main cohort

| Factor                                 | Crude                  |         | Model 1 <sup>a</sup> |         | Model 2 <sup>b</sup> |         | Model 3 <sup>c</sup>   |         |
|----------------------------------------|------------------------|---------|----------------------|---------|----------------------|---------|------------------------|---------|
|                                        | HR 95%CI               | P value | HR 95%CI             | P value | HR 95%CI             | P value | HR 95%CI               | P value |
| Antiviral                              |                        |         |                      |         |                      |         |                        |         |
| Nirmatrelvir-ritonavir                 | 1 (ref)                |         | 1 (ref)              |         | 1 (ref)              |         | 1 (ref)                |         |
| Azvudine                               | 0.93 (0.75~1.16)       | 0.516   | 0.93 (0.75~1.16)     | 0.524   | 0.88 (0.70~1.10)     | 0.252   | 0.87 (0.69~1.09)       | 0.220   |
| Age, Mean ± SD, yr                     | 0.99 (0.99~1.00)       | 0.121   | 0.99 (0.99~1.00)     | 0.127   | 0.99 (0.98~1.00)     | 0.122   | 0.99 (0.98~1.00)       | 0.238   |
| Sex, n (%)                             |                        |         |                      |         |                      |         |                        |         |
| Male                                   | 1 (ref)                |         | 1 (ref)              |         | 1 (ref)              |         | 1 (ref)                |         |
| Female                                 | 1.21 (0.98~1.50)       | 0.078   | 1.19 (0.96~1.48)     | 0.119   | 1.21 (0.97~1.50)     | 0.094   | 1.23 (0.99~1.54)       | 0.066   |
| BMI, Mean ± SD                         | 0.99 (0.95~1.02)       | 0.408   | 0.99 (0.96~1.03)     | 0.676   | 0.99 (0.95~1.02)     | 0.443   | 0.98 (0.95~1.02)       | 0.394   |
| Severity of COVID-19, n (%)            |                        |         |                      |         |                      |         |                        |         |
| Mild-to-moderate                       | 1 (ref)                |         | 1 (ref)              |         | 1 (ref)              |         | 1 (ref)                |         |
| Severe                                 | 0.76 (0.55~1.04)       | 0.085   | 0.80 (0.57~1.11)     | 0.174   | 0.83 (0.60~1.16)     | 0.280   | 0.88 (0.62~1.25)       | 0.489   |
| Smoking, n (%)                         | 0.93 (0.62~1.39)       | 0.712   |                      |         |                      |         |                        |         |
| Drinking, n (%)                        | 0.95 (0.60~1.51)       | 0.836   |                      |         |                      |         |                        |         |
| Diabetes, n (%)                        | 0.87 (0.68~1.12)       | 0.275   |                      |         | 0.88 (0.68~1.14)     | 0.321   | 0.86 (0.66~1.12)       | 0.274   |
| Cardiovascular diseases, n (%)         | 0.88 (0.70~1.10)       | 0.258   |                      |         | 0.95 (0.74~1.21)     | 0.680   | 0.93 (0.73~1.19)       | 0.558   |
| Chronic lung disease, n (%)            | 0.83 (0.63~1.11)       | 0.211   |                      |         | 0.83 (0.62~1.12)     | 0.220   | 0.84 (0.63~1.13)       | 0.251   |
| Tumor and immunosuppression, n (%)     | 0.82 (0.64~1.05)       | 0.122   |                      |         | 0.72 (0.55~0.94)     | 0.016   | 0.72 (0.55~0.94)       | 0.017   |
| LTM, Median (IQR), ×10 <sup>9</sup> /L | 1.03 (0.99~1.07)       | 0.177   |                      |         |                      |         | 1.03 (0.99~1.07)       | 0.182   |
| D-dimer, Median (IQR), mg/L            | 0.97 (0.94~1.00)       | 0.027   |                      |         |                      |         | 0.97 (0.94~1.00)       | 0.050   |
| CRP, Median (IQR), mg/L                | 0.999<br>(0.998~1.002) | 0.924   |                      |         |                      |         | 1.001<br>(0.998~1.003) | 0.562   |

Abbreviation: HR, hazard ratio; IQR, interquartile range; LTM, lymphocyte count; CRP, C-reactive protein; BMI, body mass index

<sup>a</sup> Model 1 was adjusted for age, sex, BMI, and severity of COVID-19; <sup>b</sup> Model 2 was adjusted as model 1 plus diabetes, cardiovascular diseases, chronic lung disease, and tumor and immunosuppression; <sup>c</sup> Model 3 was adjusted as model 2 plus LTM, D-dimer, and CRP.

**Table S5** Univariate and multivariate linear regression analyses of the first nucleic acid negative conversion time for the main cohort

| Factor                             | Crude              |         | Model 1 <sup>a</sup> |         | Model 2 <sup>b</sup> |         | Model 3 <sup>c</sup> |         |
|------------------------------------|--------------------|---------|----------------------|---------|----------------------|---------|----------------------|---------|
|                                    | $\beta$ 95%CI      | P value | $\beta$ 95%CI        | P value | $\beta$ 95%CI        | P value | $\beta$ 95%CI        | P value |
| Antiviral                          |                    |         |                      |         |                      |         |                      |         |
| Nirmatrelvir-ritonavir             | 1 (ref)            |         | 1 (ref)              |         | 1 (ref)              |         | 1 (ref)              |         |
| Azvudine                           | 1.89 (0.21~3.58)   | 0.029   | 2.06 (0.37~3.75)     | 0.018   | 2.39 (0.64~4.14)     | 0.008   | 2.53 (0.76~4.29)     | 0.005   |
| Age, Mean $\pm$ SD, yr             | 0.05 (-0.02~0.11)  | 0.162   | 0.04 (-0.02~0.11)    | 0.190   | 0.03 (-0.04~0.10)    | 0.397   | 0.02 (-0.06~0.09)    | 0.648   |
| Sex, n (%)                         |                    |         |                      |         |                      |         |                      |         |
| Male                               | 1 (ref)            |         | 1 (ref)              |         | 1 (ref)              |         | 1 (ref)              |         |
| Female                             | -1.04 (-2.72~0.63) | 0.223   | -1.29 (-2.97~0.39)   | 0.133   | -1.19 (-2.87~0.49)   | 0.167   | -1.35 (-3.04~0.35)   | 0.121   |
| BMI, Mean $\pm$ SD                 | -0.16 (-0.43~0.11) | 0.250   | -0.16 (-0.44~0.12)   | 0.255   | -0.13 (-0.42~0.15)   | 0.354   | -0.12 (-0.40~0.16)   | 0.408   |
| Severity of COVID-19, n (%)        |                    |         |                      |         |                      |         |                      |         |
| Mild-to-moderate                   | 1 (ref)            |         | 1 (ref)              |         | 1 (ref)              |         | 1 (ref)              |         |
| Severe                             | 0.47 (-2.04~2.98)  | 0.715   | 0.55 (-1.98~3.07)    | 0.671   | 0.41 (-2.13~2.96)    | 0.750   | 0.05 (-2.59~2.69)    | 0.969   |
| Smoking, n (%)                     | 0.38 (-2.82~3.59)  | 0.814   |                      |         |                      |         |                      |         |
| Drinking, n (%)                    | 0.88 (-2.71~4.47)  | 0.630   |                      |         |                      |         |                      |         |
| Diabetes, n (%)                    | 1.32 (-0.56~3.21)  | 0.170   |                      |         | 0.85 (-1.13~2.83)    | 0.399   | 0.91 (-1.07~2.89)    | 0.369   |
| Cardiovascular diseases, n (%)     | 1.08 (-0.64~2.80)  | 0.218   |                      |         | 0.53 (-1.34~2.41)    | 0.576   | 0.74 (-1.14~2.62)    | 0.441   |
| Chronic lung disease, n (%)        | 1.74 (-0.43~3.92)  | 0.117   |                      |         | 1.77 (-0.46~4.01)    | 0.121   | 1.72 (-0.51~3.95)    | 0.132   |
| Tumor and Immunosuppression, n (%) | 0.43 (-1.47~2.34)  | 0.656   |                      |         | 1.34 (-0.67~3.34)    | 0.192   | 1.27 (-0.74~3.27)    | 0.216   |
| LTM, Median (IQR), $\times 10^9/L$ | -0.17 (-0.55~0.21) | 0.380   |                      |         |                      |         | -0.14 (-0.53~0.24)   | 0.469   |
| D-dimer, Median (IQR), mg/L        | 0.25 (0.02~0.48)   | 0.036   |                      |         |                      |         | 0.28 (0.03~0.52)     | 0.027   |
| CRP, Median (IQR), mg/L            | 0.00 (-0.02~0.01)  | 0.583   |                      |         |                      |         | 0.00 (-0.02~0.01)    | 0.605   |

Abbreviation: IQR, interquartile range; LTM, lymphocyte count; CRP, C-reactive protein; BMI, body mass index

<sup>a</sup> Model 1 was adjusted for age, sex, BMI, and severity of COVID-19; <sup>b</sup> Model 2 was adjusted as model 1 plus diabetes, cardiovascular diseases, chronic lung disease, and tumor and immunosuppression; <sup>c</sup> Model 3 was adjusted as model 2 plus LTM, D-dimer, and CRP.

**Table S6** Univariate and multivariate linear regression analyses of the hospital length of stay for the main cohort study

| Factor                                             | Crude              |         | Model 1 <sup>a</sup> |         | Model 2 <sup>b</sup> |         | Model 3 <sup>c</sup> |         |
|----------------------------------------------------|--------------------|---------|----------------------|---------|----------------------|---------|----------------------|---------|
|                                                    | $\beta$ 95%CI      | P value | $\beta$ 95%CI        | P value | $\beta$ 95%CI        | P value | $\beta$ 95%CI        | P value |
| Antiviral                                          |                    |         |                      |         |                      |         |                      |         |
| Nirmatrelvir-ritonavir                             | 1 (ref)            |         | 1 (ref)              |         | 1 (ref)              |         | 1 (ref)              |         |
| Azvudine                                           | -1.43 (-3.35~0.48) | 0.143   | -1.24 (-3.12~0.65)   | 0.201   | -0.85 (-2.81~1.11)   | 0.396   | -0.95 (-2.93~1.04)   | 0.350   |
| Age, Mean $\pm$ SD, yr                             | 0.15 (0.08~0.22)   | <0.001  | 0.14 (0.07~0.22)     | <0.001  | 0.13 (0.05~0.21)     | 0.002   | 0.13 (0.05~0.21)     | 0.002   |
| Sex, n (%)                                         |                    |         |                      |         |                      |         |                      |         |
| Male                                               | 1 (ref)            |         | 1 (ref)              |         | 1 (ref)              |         | 1 (ref)              |         |
| Female                                             | -0.22 (-2.13~1.70) | 0.825   | -0.31 (-2.21~1.58)   | 0.745   | -0.23 (-2.13~1.66)   | 0.809   | -0.34 (-2.27~1.59)   | 0.727   |
| BMI, Mean $\pm$ SD                                 | -0.25 (-0.56~0.05) | 0.106   | -0.15 (-0.46~0.16)   | 0.331   | -0.12 (-0.43~0.19)   | 0.451   | -0.12 (-0.43~0.20)   | 0.474   |
| Severity of COVID-19, n (%)                        |                    |         |                      |         |                      |         |                      |         |
| Mild-to-moderate                                   | 1 (ref)            |         | 1 (ref)              |         | 1 (ref)              |         | 1 (ref)              |         |
| Severe                                             | 0.30 (-2.52~3.11)  | 0.836   | 0.37 (-2.43~3.17)    | 0.798   | 0.27 (-2.55~3.10)    | 0.849   | 0.49 (-2.54~3.51)    | 0.752   |
| Smoking, n (%)                                     | -0.50 (-4.08~3.09) | 0.786   |                      |         |                      |         |                      |         |
| Drinking, n (%)                                    | -0.47 (-4.50~3.56) | 0.819   |                      |         |                      |         |                      |         |
| Diabetes, n (%)                                    | 1.91 (-0.21~4.04)  | 0.079   |                      |         | 0.75 (-1.47~2.98)    | 0.506   | 0.68 (-1.55~2.92)    | 0.550   |
| Cardiovascular and cerebrovascular diseases, n (%) | 2.07 (0.12~4.02)   | 0.038   |                      |         | 0.70 (-1.40~2.80)    | 0.513   | 0.70 (-1.42~2.81)    | 0.517   |
| Chronic lung disease, n (%)                        | 2.71 (0.20~5.21)   | 0.035   |                      |         | 1.82 (-0.72~4.36)    | 0.160   | 1.80 (-0.75~4.35)    | 0.168   |
| Tumor and Immunosuppression, n (%)                 | 0.66 (-1.48~2.79)  | 0.545   |                      |         | 1.41 (-0.81~3.64)    | 0.214   | 1.49 (-0.76~3.74)    | 0.196   |
| LTM, Median (IQR), $\times 10^9/L$                 | -0.12 (-0.54~0.30) | 0.590   |                      |         |                      |         | -0.13 (-0.55~0.29)   | 0.550   |
| D-dimer, Median (IQR), mg/L                        | 0.20 (-0.11~0.50)  | 0.210   |                      |         |                      |         | 0.05 (-0.28~0.37)    | 0.784   |
| CRP, Median (IQR), mg/L                            | -0.01 (-0.02~0.01) | 0.537   |                      |         |                      |         | -0.01 (-0.03~0.01)   | 0.337   |

Abbreviation: IQR, interquartile range; LTM, lymphocyte count; CRP, C-reactive protein; BMI, body mass index; <sup>a</sup> Model 1 was adjusted for age, sex, BMI, and severity of COVID-19 before antivirals; <sup>b</sup> Model 2 was adjusted as model 1 plus diabetes, cardiovascular diseases, chronic lung disease, and tumor and immunosuppression; <sup>c</sup> Model 3 was adjusted as model 2 plus LTM, D-dimer, and CRP.



**Table S7** Baseline characteristics of study participants of the complete dataset with missing values removing according to oral antivirals (n=387)

| Characteristic                                | Total (n = 387)     | Nirmatrelvir-ritonavir (n = 241) | Azvdudine (n = 146) | P value <sup>a</sup> |
|-----------------------------------------------|---------------------|----------------------------------|---------------------|----------------------|
| Age, Mean ± SD, yr                            | 76.69 ± 12.83       | 76.89 ± 13.45                    | 76.36 ± 11.79       | 0.691                |
| Sex, n (%)                                    |                     |                                  |                     | 0.200                |
| Male                                          | 241 (62.27)         | 156 (64.73)                      | 85 (58.22)          |                      |
| Female                                        | 146 (37.73)         | 85 (35.27)                       | 61 (41.78)          |                      |
| BMI, Mean ± SD <sup>b</sup>                   | 22.86 ± 3.18        | 22.89 ± 3.27                     | 22.81 ± 3.04        | 0.812                |
| Severity of COVID-19 before antivirals, n (%) |                     |                                  |                     | 0.822                |
| Mild-to-moderate                              | 332 (85.79)         | 206 (85.48)                      | 126 (86.30)         |                      |
| Severe                                        | 55 (14.21)          | 35 (14.52)                       | 20 (13.70)          |                      |
| Smoking, n (%)                                | 30 (7.75)           | 17 (7.05)                        | 13 (8.90)           | 0.509                |
| Drinking, n (%)                               | 22 (5.68)           | 12 (4.98)                        | 10 (6.85)           | 0.441                |
| Diabetes, n (%)                               | 101 (26.10)         | 58 (24.07)                       | 43 (29.45)          | 0.242                |
| Cardiovascular disease, n (%)                 | 132 (34.11)         | 79 (32.78)                       | 53 (36.30)          | 0.479                |
| Chronic lung disease, n (%)                   | 62 (16.02)          | 49 (20.33)                       | 13 (8.90)           | 0.003                |
| Tumor and immunosuppression, n (%)            | 102 (26.36)         | 79 (32.78)                       | 23 (15.75)          | < 0.001              |
| LTM, Median (IQR), ×10 <sup>9</sup> /L        | 0.80 (0.50, 1.20)   | 0.80 (0.50, 1.10)                | 1.00 (0.70, 1.30)   | < 0.001              |
| D-dimer, Median (IQR), mg/L                   | 0.92 (0.52, 1.89)   | 0.96 (0.55, 2.05)                | 0.87 (0.49, 1.56)   | 0.090                |
| CRP, Median (IQR), mg/L                       | 29.00 (9.04, 68.60) | 37.60 (12.50, 77.30)             | 19.60 (5.12, 52.70) | < 0.001              |

Abbreviation: IQR, interquartile range; LTM, lymphocyte count; CRP, C-reactive protein; BMI, body mass index.

<sup>a</sup> P value was based on Student's t-test, Mann-Whitney U test,  $\chi^2$  tests, or Fisher's exact, as appropriate.

<sup>b</sup> BMI was calculated as weight in kilograms divided by height in meters squared.

**Table S8** Associations between antivirals use and the efficacy outcomes in regression analysis for complete cohort (n=387)

| Outcomes <sup>a</sup>                                                            | Nirmatrelvir-ritonavir<br>(n =241) | Azvudine<br>(n = 146)   | Crude                        |            | Model 1 <sup>b</sup>         |            | Model 2 <sup>c</sup>         |            | Model 3 <sup>d</sup>         |            |
|----------------------------------------------------------------------------------|------------------------------------|-------------------------|------------------------------|------------|------------------------------|------------|------------------------------|------------|------------------------------|------------|
|                                                                                  |                                    |                         | HR 95%CI<br>or $\beta$ 95%CI | P<br>value |
| All-cause 28-day mortality, n (%)                                                | 9 (3.73)                           | 8 (5.48)                | 1.46<br>(0.56~3.77)          | 0.440      | 1.55<br>(0.59~4.05)          | 0.376      | 1.56<br>(0.58~4.17)          | 0.379      | 1.77<br>(0.61~5.13)          | 0.294      |
| Risk of 28-day progressing to critical condition, n (%)                          | 12 (4.98)                          | 12 (8.22)               | 1.66<br>(0.75~3.70)          | 0.213      | 1.87<br>(0.83~4.20)          | 0.131      | 1.98<br>(0.86~4.53)          | 0.106      | 2.31<br>(0.97~5.51)          | 0.058      |
| Proportion of 28-day negative conversion of nucleic acid, n (%)                  | 198 (82.16)                        | 124 (84.93)             | 0.88<br>(0.70~1.10)          | 0.248      | 0.88<br>(0.70~1.10)          | 0.247      | 0.81<br>(0.64~1.02)          | 0.070      | 0.81<br>(0.64~1.02)          | 0.072      |
| The first nucleic acid negative conversion time, Median (IQR), days <sup>e</sup> | 14.00<br>(10.00, 20.25)            | 16.00<br>(12.00, 21.00) | 2.08<br>(0.35~3.82)          | 0.019      | 2.20<br>(0.45~3.94)          | 0.014      | 2.59<br>(0.80~4.39)          | 0.005      | 2.60<br>(0.78~4.42)          | 0.005      |
| Hospital length of stay, Median (IQR), days <sup>f</sup>                         | 13.00<br>(9.00, 23.00)             | 15.00<br>(10.00, 20.00) | -1.43<br>(-3.35~0.48)        | 0.143      | -1.24<br>(-3.12~0.65)        | 0.201      | -0.85<br>(-2.81~1.11)        | 0.396      | -0.95<br>(-2.93~1.04)        | 0.350      |

Abbreviation: HR, hazard ratio; IQR, interquartile range

<sup>a</sup>was measured by azvudine vs nirmatrelvir-ritonavir

<sup>b</sup>Model 1 was adjusted for age, sex, BMI, and severity of COVID-19 before antivirals.

<sup>c</sup>Model 2 was adjusted as model 1 plus diabetes, cardiovascular diseases, chronic lung disease, and tumor and immunosuppression.

<sup>d</sup>Model 3 was adjusted as model 2 plus LTM, D-dimer, and CRP.

<sup>e</sup> patients who died or lost before the nucleic acid turned negative were further excluded

<sup>f</sup> patients who died during hospitalization were further excluded

**Fig. S1** Forest plot for subgroup analyses of the efficacy of azvudine versus nirmatrelvir-ritonavir on all-cause 28-day mortality in patients with COVID-19 for main cohort

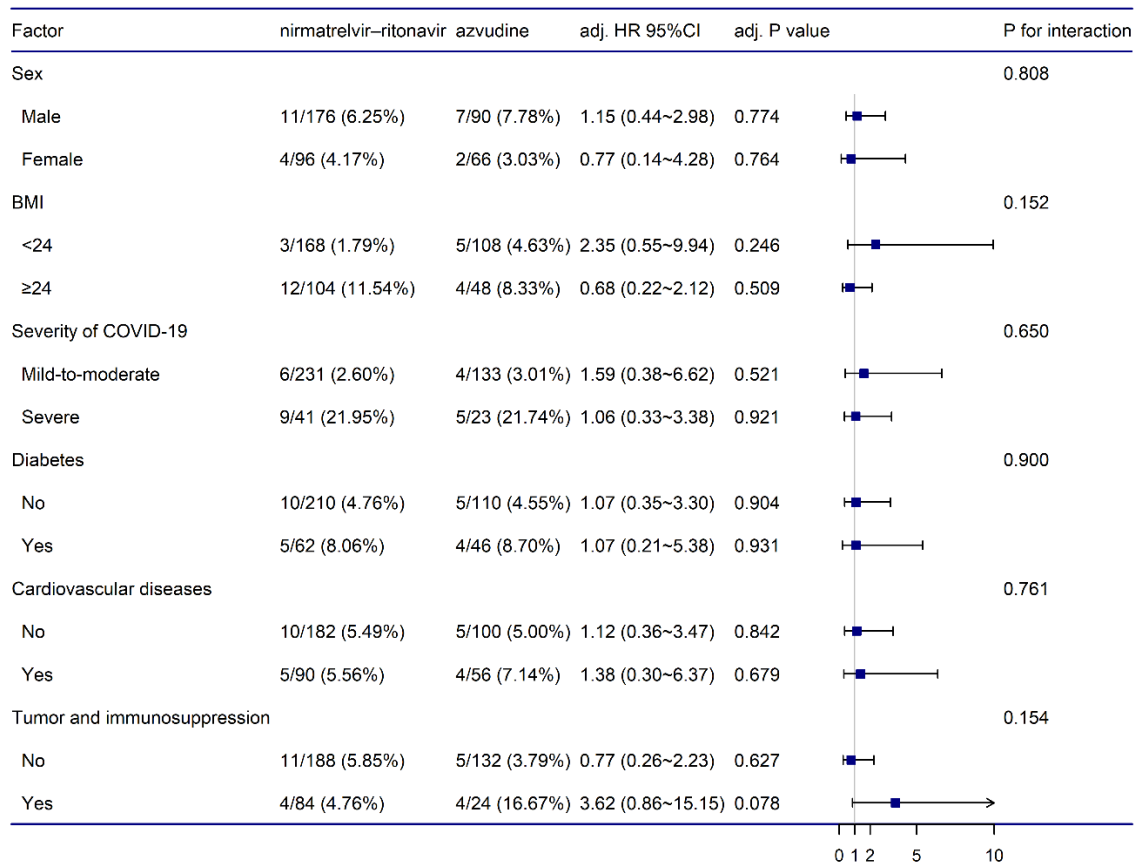

Hazard ratios are plotted as squares, the horizontal lines represent 95% confidence intervals.

**Fig. S2** Forest plot for subgroup analyses of the efficacy of azvudine versus nirmatrelvir-ritonavir on risk of progressing to critical condition within 28 days in patients with COVID-19 for main cohort

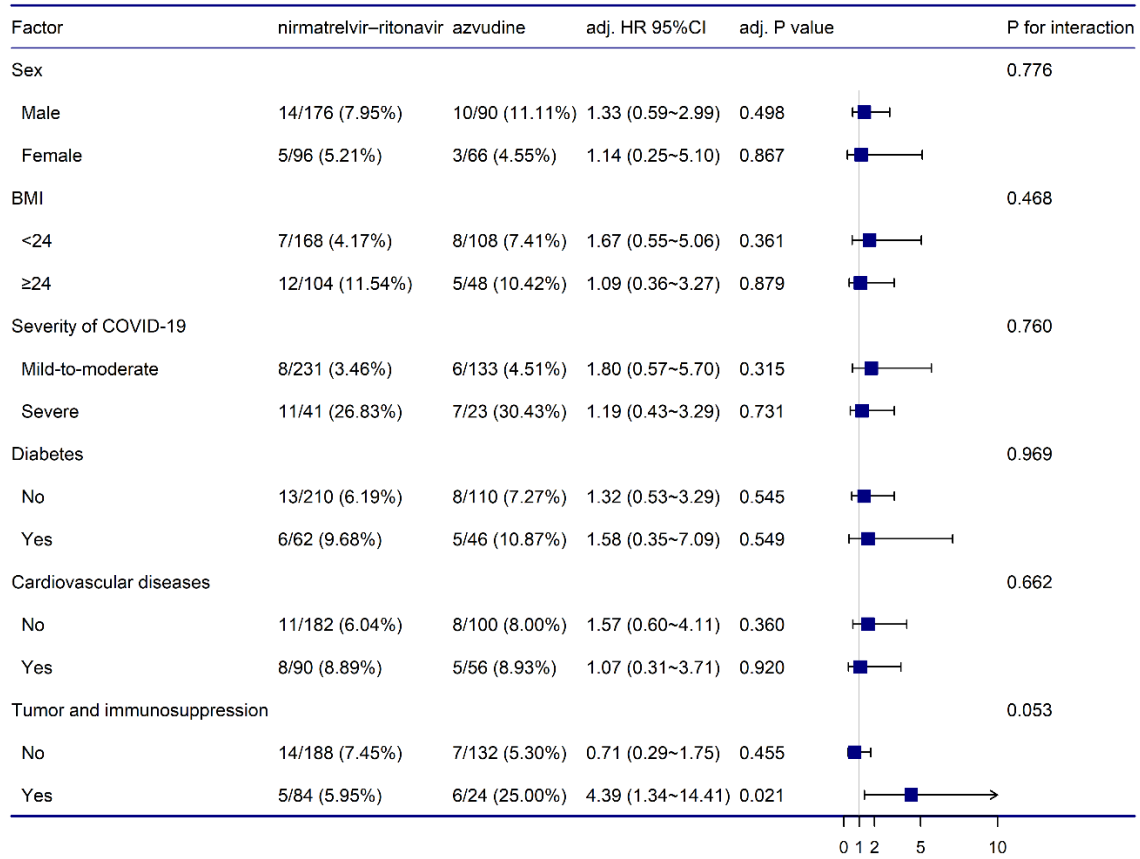

Hazard ratios are plotted as squares, the horizontal lines represent 95% confidence intervals.

**Fig. S3** Forest plot for subgroup analyses of the efficacy of azvudine versus nirmatrelvir-ritonavir on proportion of 28-day negative conversion of nucleic acid in patients with COVID-19 infection for main cohort

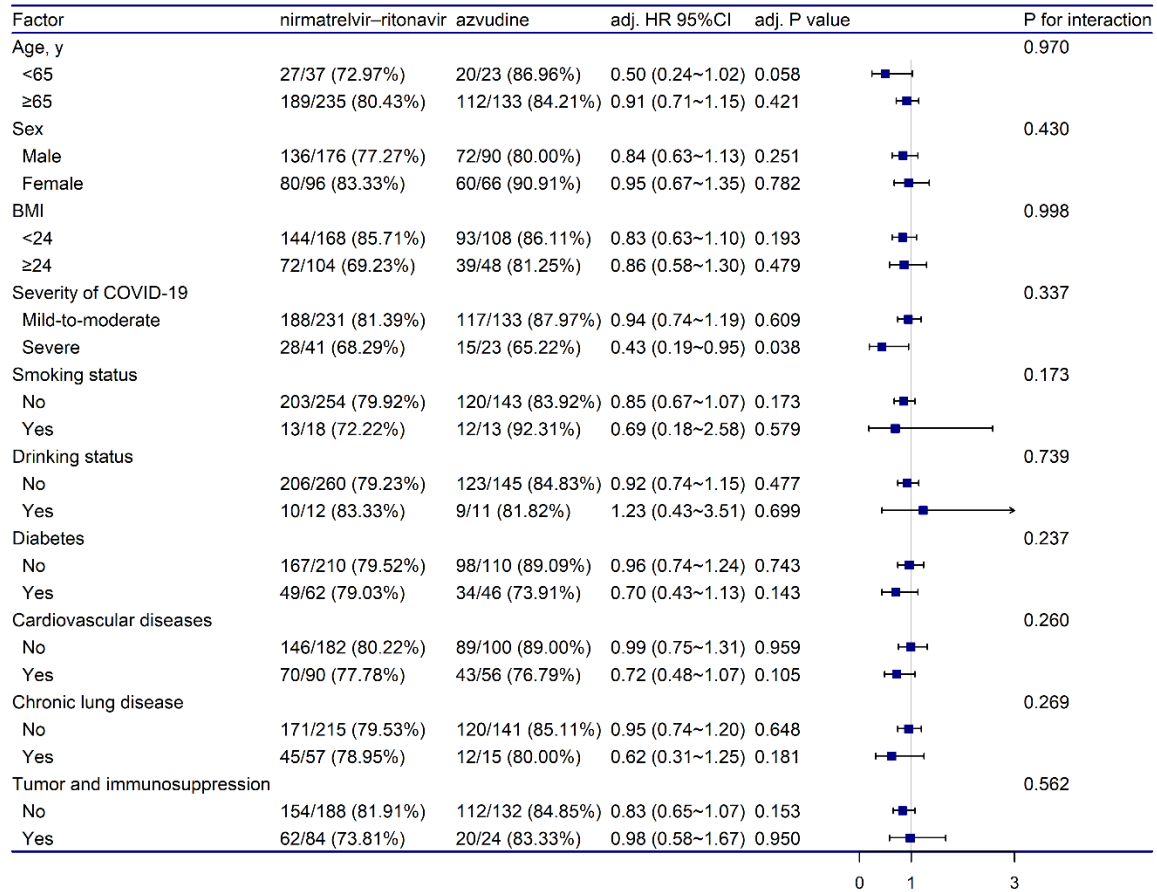

Hazard ratios are plotted as squares, the horizontal lines represent 95% confidence intervals.

**Fig. S4** Forest plot for subgroup analyses of the efficacy of azvudine versus nirmatrelvir-ritonavir on the first nucleic acid negative conversion time in patients with COVID-19 infection for main cohort

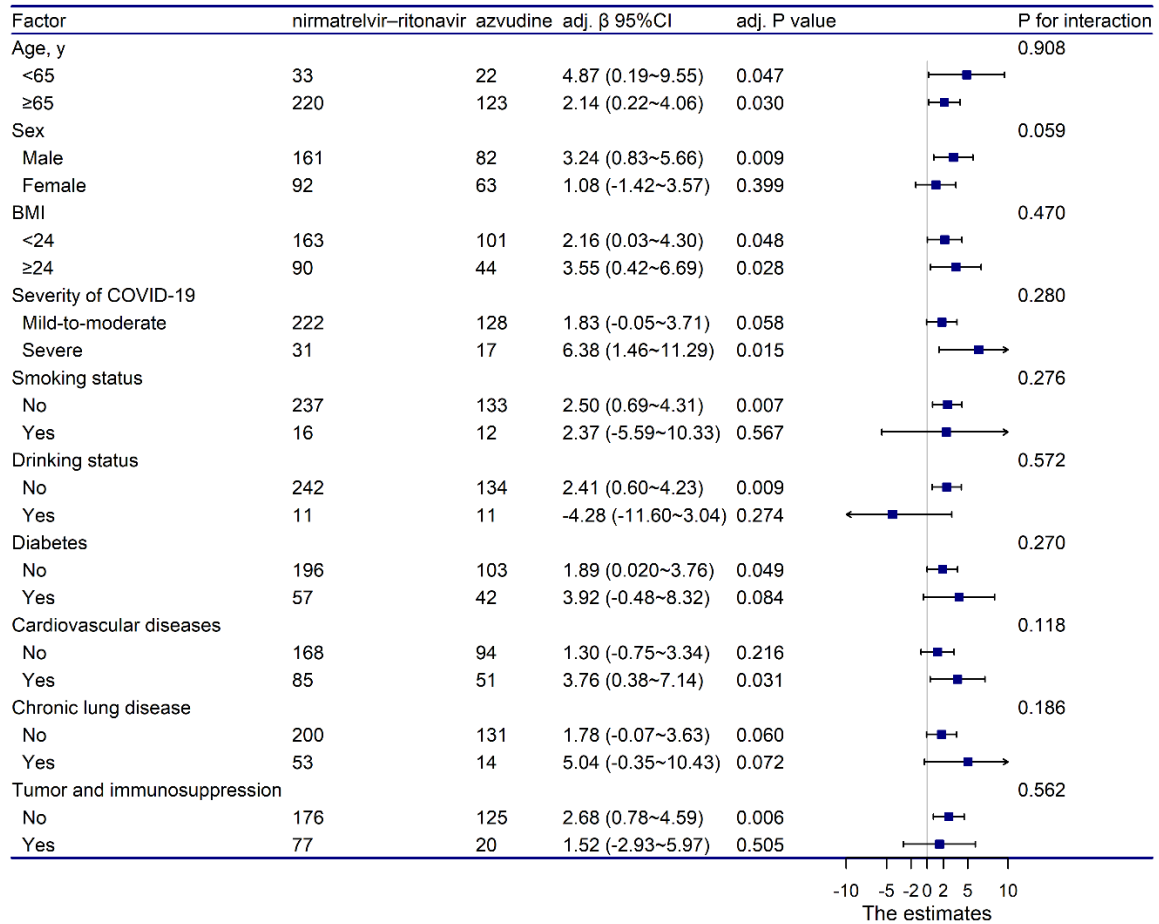

Estimated  $\beta$  is plotted as squares, the horizontal lines represent 95% confidence intervals.

**Fig. S5** Forest plot for subgroup analyses of the efficacy of azvudine versus nirmatrelvir-ritonavir on the hospital length of stay in patients with COVID-19 for main cohort

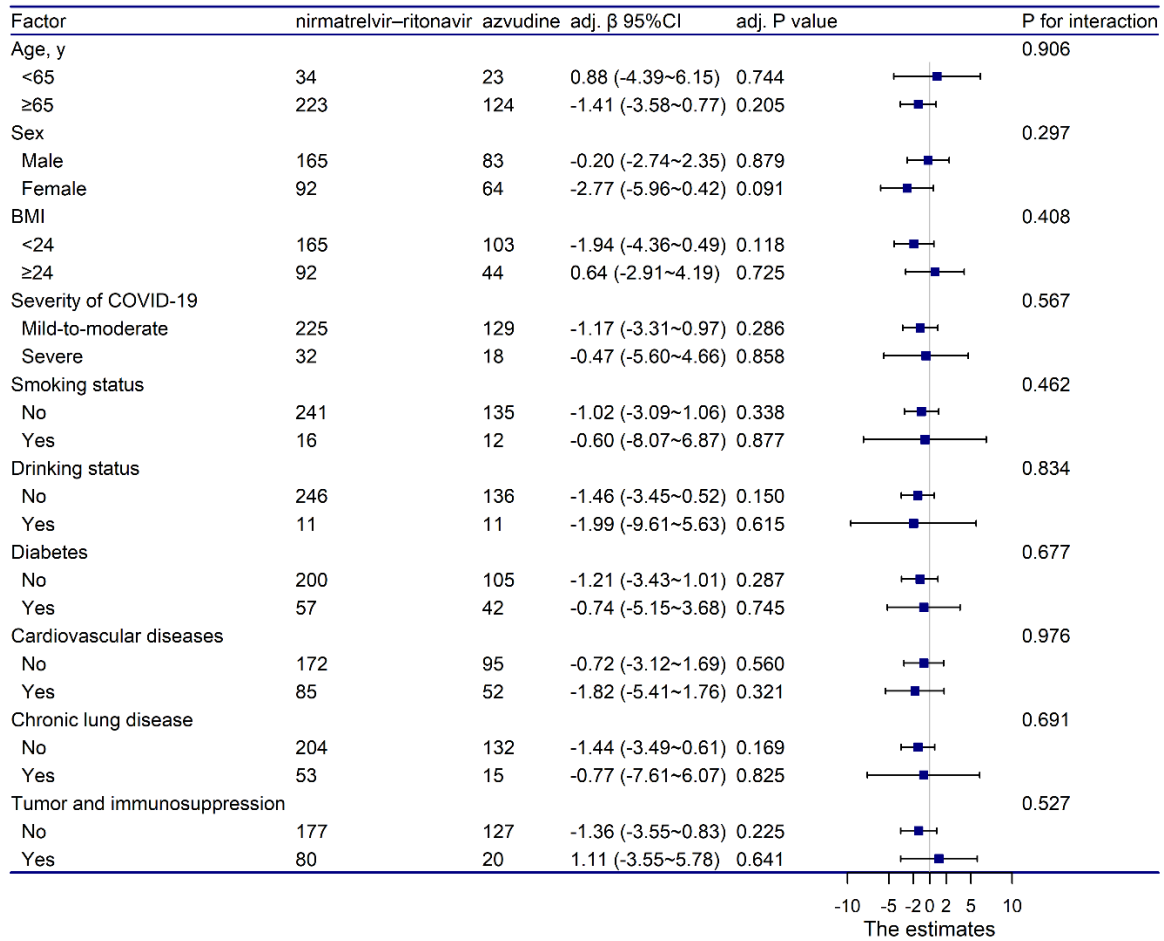

Estimated  $\beta$  is plotted as squares, the horizontal lines represent 95% confidence intervals.
